# Supplementary material for: Elder Abuse Severity: A Critical but Understudied Dimension of Victimization for Clinicians and Researchers
Source: Oxford University Press journal article supplement (doi:10.1093/geront/gnv688), 2016-02-13
Supplement: gnv688_suppl_Appendix_A.docx [file gnv688_suppl_Appendix_A.docx]

**Appendix A: Elder Mistreatment Assessment Questions**

A modified version of the Conflict Tactics Scale (CTS) was used to assess elder emotional and physical abuse (Pillemer & Finkelhor, 1988; Strauss, 1995). Elder neglect was evaluated by failure to meet the elder’s needs by a responsible caregiver, using Duke Older Americans Resources and Services (OARS) instrumental activities of daily living (IADL) and ADL scales (Fillenbaum & Smyer, 1981).

Emotional Abuse

Since you turned 60 years old has someone you live with or spend a lot of time with:

Done or said something to spite you?

Insulted or sworn at you?

Threatened to hit or throw something at you?

For each question that a respondent answered “yes”, the respondent was asked about the nature of the relationship with the other person (from a list of different relationships of trust) and how many times it happened in the past year (none, once, two to ten times, or more than ten times).

Physical Abuse

Since you turned 60 years old has someone you live with or spend a lot of time with:

Thrown something at you?

Tried to slap or hit you?

Pushed, grabbed or shoved you?

Slapped you?

Kicked, bit or hit you with a fist?

Hit or tried to hit you with something?

Locked you in your room?

Beat you up?

Threatened you with a knife or gun?

Used a knife or gun?

Done anything violent to you that you have not mentioned?

For each question that a respondent answered “yes”, the respondent was asked about the nature of the relationship with the other person (from a list of different relationships of trust) and how many times it happened in the past year (none, once, two to ten times, or more than ten times).

Neglect

Older adult respondents were asked the following questions:

Are you able to go shopping for groceries and clothes without any help at all from someone else?

Are you able to prepare your own meals without any help at all from someone else?

Are you able to do the routine housework that needs to be done in your home without any help at all from someone else?

Are you able to take your medicines in the right doses and at the right times without any help at all from someone else?

Are you able to cut and eat your food without any help at all from someone else?

Are you able to dress and undress yourself without any help at all from someone else?

Are you able to walk without any help at all from someone else?

Can you get in and out of bed with some help, or are you totally dependent on someone else to lift you?

Can you take a bath or shower with some help, or are you totally dependent on someone else to bathe you?

Does anyone ever help you use the bathroom?

Is there anything else someone helps you with?

For each IADL/ADL activity that a respondent could not complete independently, the respondent was asked who was responsible for helping with the activity (from a list of different relationships of trust), whether that person had failed to help since age 60, and how many times this failed help had happened in the past year (none, once, two to ten times, or more than ten times).
